# Supplementary material for: Comparative Analyses of the Impact of Different Criteria for Sepsis Diagnosis on Outcome in Patients with Spontaneous Subarachnoid Hemorrhage
Source: MDPI journal article supplement (doi:10.3390/jcm11133873), 2022-07-04
Supplement: s1 [file s1]

## **Supplementary Materials**

# **Comparative Analyses of the Impact of Different Criteria for Sepsis Diagnosis on Outcome in Patients with Spontaneous Subarachnoid Hemorrhage**

**Franz-Simon Centner, Mariella Eliana Oster, Franz-Joseph Dally, Johannes Sauter-Servaes, Tanja Pelzer, Jochen Johannes Schoettler, Bianka Hahn, Anna-Meagan Fairley, Amr Abdulazim, Katharina Antonia Margarete Hackenberg, Christoph Groden, Nima Etminan, Joerg Krebs, Manfred Thiel, Holger Wenz and Máté Elod Maros**

**Table S1.** Reasons for exclusion of patients during neuroradiological validation <sup>a</sup>.

| <b>Reason for exclusion</b>                                 | <b>N</b>  |
|-------------------------------------------------------------|-----------|
| Traumatic SAH                                               | 14        |
| Readmission: initial SAH ictus not in study period          | 9         |
| No CT scan of initial SAH available                         | 6         |
| Transfer: SAH initially treated elsewhere                   | 6         |
| Ischemic stroke with SAH component                          | 5         |
| Intracerebral bleeding with SAH component                   | 5         |
| No SAH                                                      | 3         |
| SAH already consolidated in initial CT                      | 2         |
| SAH associated with cerebral neoplasia                      | 2         |
| Arterio-venous malformation with SAH component              | 2         |
| SAH as surgical complication                                | 2         |
| Subdural hematoma with SAH component                        | 1         |
| SAH associated with severe coagulation abnormalities due to |           |
| ECMO therapy                                                | 5         |
| cardiac resuscitation                                       | 3         |
| sepsis                                                      | 3         |
| cerebritis                                                  | 1         |
| Missing data                                                | 1         |
| <b>Total</b>                                                | <b>70</b> |

<sup>a</sup> reducing the number of study patients from 340 preselected by ICD-Code to 270

**Table S2.** Organ dysfunctions associated with sepsis according to alternative sepsis criteria and relation to death.

| <b>Organ system</b>    | <b>Organ dysfunction<br/>N (% of septic patients)</b> | <b>Deceased<br/>N (% of patients affected by<br/>this organ dysfunction)</b> |
|------------------------|-------------------------------------------------------|------------------------------------------------------------------------------|
| Cardiovascular         | 54 (96)                                               | 14 (26)                                                                      |
| Respiration            | 38 (68)                                               | 12 (32)                                                                      |
| Central nervous system | 21 (38)                                               | 3 (14)                                                                       |
| Renal                  | 19 (34)                                               | 7 (37)                                                                       |
| Gastrointestinal       | 13 (23)                                               | 4 (31)                                                                       |
| Coagulation            | 8 (14)                                                | 5 (63)                                                                       |
| Liver                  | 6 (11)                                                | 4 (66)                                                                       |
| Total                  | 56 (100)                                              | 14 (25)                                                                      |

**Table S3.** Univariate and multivariate logistic regression models including different criteria for sepsis added separately to a model of SAH variables to investigate association with functional outcome (mRS) at discharge.

| Variable                              | Unfavorable outcome<br>mRS 4-6<br>N=153<br>N (%) | Favorable outcome<br>mRS 0-3<br>N=117<br>N (%) | Univariate<br>p value | Multivariate model 1 <sup>a</sup> |                     | Multivariate model<br>septic shock<br>Sepsis-3_mod |                     | Multivariate model<br>alternative criteria for<br>septic shock |                     |
|---------------------------------------|--------------------------------------------------|------------------------------------------------|-----------------------|-----------------------------------|---------------------|----------------------------------------------------|---------------------|----------------------------------------------------------------|---------------------|
|                                       |                                                  |                                                |                       | adjusted<br>OR (95% CI)           | adjusted<br>p value | adjusted<br>OR (95% CI)                            | adjusted<br>p value | adjusted<br>OR (95% CI)                                        | adjusted<br>p value |
| Age, mean (CLM)                       | 61 (59-63)                                       | 54 (52-56)                                     | <b>&lt;.001</b>       | 1.04 (1.01-1.07)                  | <b>0.011</b>        | 1.04 (1.01-1.07)                                   | <b>0.010</b>        | 1.04 (1.01-1.07)                                               | <b>0.011</b>        |
| Female                                | 107 (70)                                         | 75 (64)                                        | 0.312                 |                                   |                     |                                                    |                     |                                                                |                     |
| Infection                             | 91 (60)                                          | 38 (33)                                        | <b>&lt;.001</b>       |                                   |                     |                                                    |                     |                                                                |                     |
| Pneumonia                             | 41 (27)                                          | 5 (4)                                          | <b>&lt;.001</b>       | 7.62 (2.43-23.92)                 | <b>0.001</b>        | 6.2 (2.02-18.97)                                   | <b>0.001</b>        | 4.7 (1.55-14.29)                                               | <b>0.006</b>        |
| WFNS 4-5                              | 83 (54)                                          | 25 (21)                                        | <b>&lt;.001</b>       | 2.52 (1.29-4.9)                   | <b>0.007</b>        | 2.55 (1.32-4.94)                                   | <b>0.005</b>        | 2.5 (1.3-4.79)                                                 | <b>0.006</b>        |
| Mod. Fisher 3-4                       | 146 (95)                                         | 89 (76)                                        | <b>&lt;.001</b>       | 4.18 (1.35-12.93)                 | <b>0.013</b>        | 4.12 (1.33-12.82)                                  | <b>0.014</b>        | 3.34 (1.11-10.04)                                              | <b>0.031</b>        |
| Hydrocephalus                         | 144 (94)                                         | 60 (51)                                        | <b>&lt;.001</b>       | 9.71 (4.02-23.44)                 | <b>&lt;.001</b>     | 9.97 (4.12-24.16)                                  | <b>&lt;.001</b>     | 10.33 (4.27-24.98)                                             | <b>&lt;.001</b>     |
| Rebleeding                            | 9 (6)                                            | 1 (1)                                          | 0.062                 | 7.67 (0.72-81.96)                 | 0.092               | 7.16 (0.7-73.8)                                    | 0.098               | 6.35 (0.64-62.59)                                              | 0.113               |
| Angiographic vasospasm                | 62 (41)                                          | 45 (39)                                        | 0.732                 |                                   |                     |                                                    |                     |                                                                |                     |
| DCI                                   | 64 (42)                                          | 35 (30)                                        | <b>0.045</b>          | 1.84 (0.95-3.57)                  | 0.070               |                                                    |                     |                                                                |                     |
| Updated DCI protocol                  | 111 (73)                                         | 90 (77)                                        | 0.415                 | 0.5 (0.24-1.05)                   | 0.066               | 0.53 (0.25-1.12)                                   | 0.096               |                                                                |                     |
| Sepsis-1                              | 89 (58)                                          | 36 (31)                                        | <b>&lt;.001</b>       |                                   |                     |                                                    |                     |                                                                |                     |
| Sepsis-3_orig                         | 47 (31)                                          | 13 (11)                                        | <b>&lt;.001</b>       |                                   |                     |                                                    |                     |                                                                |                     |
| Sepsis-3_mod                          | 47 (31)                                          | 13 (11)                                        | <b>&lt;.001</b>       |                                   |                     |                                                    |                     |                                                                |                     |
| Alternative sepsis criteria           | 45 (29)                                          | 11 (9)                                         | <b>&lt;.001</b>       |                                   |                     |                                                    |                     |                                                                |                     |
| Septic shock Sepsis-1                 | 80 (52)                                          | 25 (21)                                        | <b>&lt;.001</b>       |                                   |                     |                                                    |                     |                                                                |                     |
| Septic shock Sepsis-3_orig            | 18 (12)                                          | 5 (4)                                          | <b>0.036</b>          |                                   |                     |                                                    |                     |                                                                |                     |
| Septic shock Sepsis-3_mod             | 22 (14)                                          | 4 (3)                                          | <b>0.005</b>          |                                   |                     | 3.22 (0.92-11.35)                                  | 0.069               |                                                                |                     |
| Alternative criteria for septic shock | 25 (16)                                          | 3 (3%)                                         | <b>0.001</b>          |                                   |                     |                                                    |                     | 5.04 (1.21-20.88)                                              | <b>0.026</b>        |

Statistical significance highlighted in bold; *CLM* 95% Confidence Limit for the Mean, *DCI* delayed cerebral ischemia, *OR* Odds Ratio, *WFNS* World Federation of Neurological Surgeons SAH grading scale; <sup>a</sup> Model 1 shows all multivariable models where sepsis criteria did not reach significance (sepsis-1, sepsis-3\_orig, sepsis-3\_mod, alternative sepsis, septic shock sepsis-1 and septic shock sepsis-3\_orig).

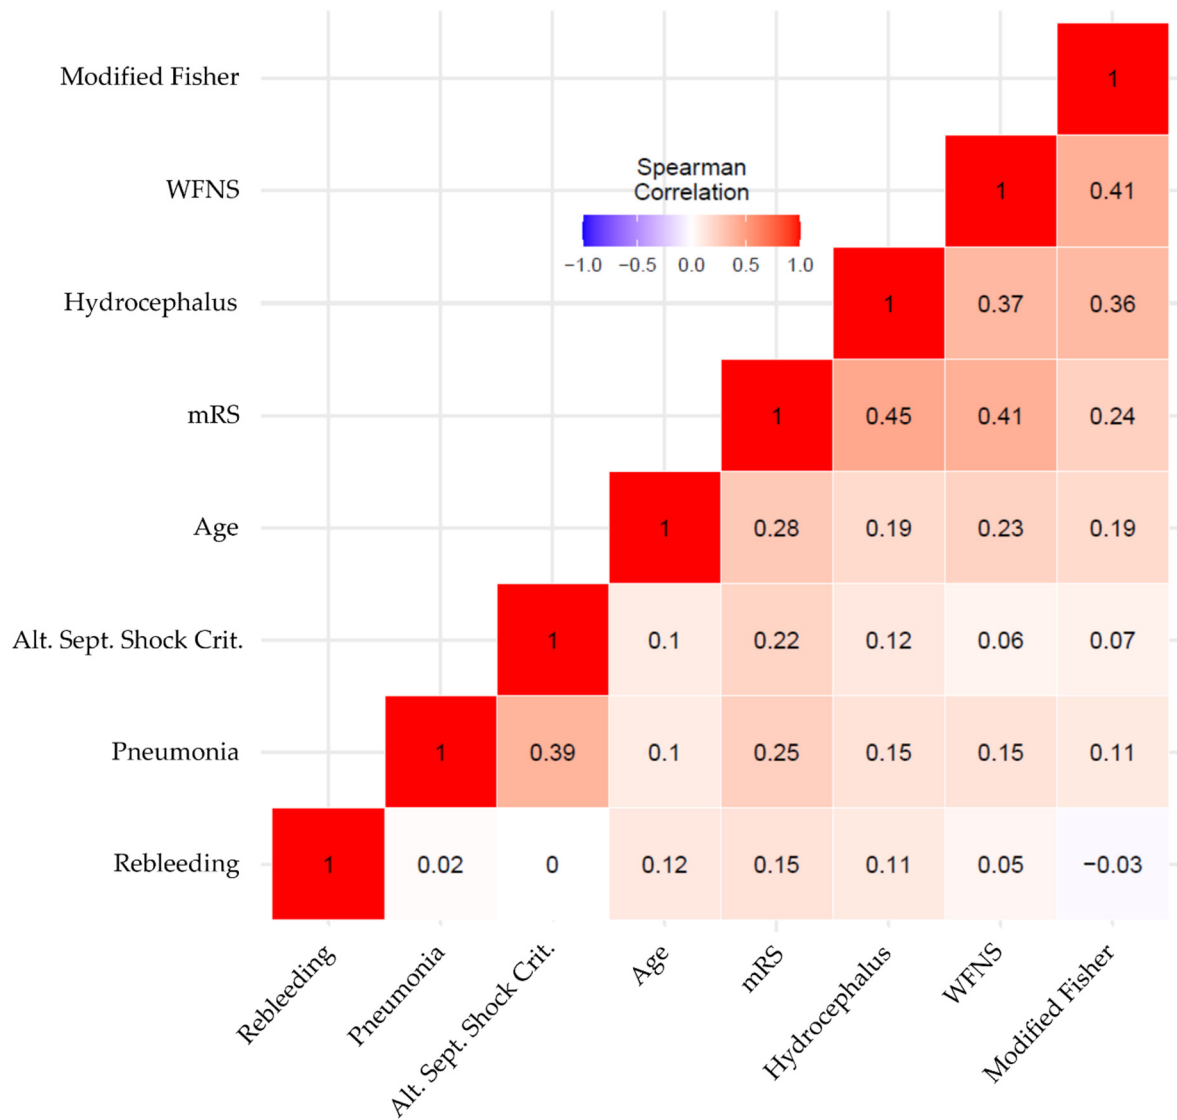

**Figure S1.** Heatmap displaying Spearman's rank correlation for variables that were significantly associated with the primary outcome (mRS) in logistic regression analysis. It is to note that mathematically it is not meaningful to code a factor variable (particularly binary factors e.g. rebleeding, pneumonia, alternative septic shock. criteria and hydrocephalus) as a numeric. Therefore, the results above should be interpreted with caution. *WFNS* World Federation of Neurological Surgeons SAH grading scale, *Alt. Sept. Shock Crit.* alternative criteria for septic shock.

**Table S4.** Results of multicollinearity analysis of variables that were significantly associated with the primary outcome (mRs) in logistic regression analysis <sup>a</sup>.

| Variable                          | Variance inflation factor (VIF) |
|-----------------------------------|---------------------------------|
| Age                               | 1.04                            |
| Pneumonia                         | 1.09                            |
| WFNS                              | 1.03                            |
| Modified Fisher                   | 1.09                            |
| Hydrocephalus                     | 1.02                            |
| Rebleeding                        | 1.06                            |
| Alternative Septic Shock criteria | 1.10                            |

WFNS World Federation of Neurological Surgeons SAH grading scale;

<sup>a</sup> All variables had a variance inflation factor (VIF) < 1.15 indicating no relevant multicollinearity, which is usually defined as VIF > 5 (James, G.; Witten, D.; Hastie, T.; Tibshirani, R. An introduction to statistical learning. Springer: New York, USA, 2013; Vol. 112.). It is to note that mathematically VIF is not defined for categorical factor variables. However, collinearity between categorical data is more complex and less well understood than collinearity between numerical regressors. Therefore, the results above should be interpreted with caution as we treated the factors as numeric variables.

**Table S5.** Sensitivity analysis excluding patients who deceased within 48 hours after ICU admission\*: Univariate and multivariate logistic regression models including different criteria for sepsis added separately to a model of SAH variables to investigate association with functional outcome (mRS) at discharge.

| Variable                              | Unfavorable Outcome<br>(mRS = 4-6)<br>N=153; N (%) | Favorable Outcome<br>(mRS = 0-3)<br>N=117; N (%) | Univariate<br>p value | Multivariate model 2 <sup>a</sup> |                     | Multivariate model septic shock<br>Sepsis-3_mod |                     | Multivariate model alternative criteria for septic shock |                     |
|---------------------------------------|----------------------------------------------------|--------------------------------------------------|-----------------------|-----------------------------------|---------------------|-------------------------------------------------|---------------------|----------------------------------------------------------|---------------------|
|                                       |                                                    |                                                  |                       | adjusted<br>OR (95% CI)           | adjusted<br>p value | adjusted<br>OR (95% CI)                         | adjusted<br>p value | adjusted<br>OR (95% CI)                                  | adjusted<br>p value |
| Age, mean (CLM)                       | 60 (58-62)                                         | 54 (52-56)                                       | <.001                 | 1.03 (1-1.06)                     | 0.028               | 1.04 (1.01-1.07)                                | 0.022               | 1.04 (1.01-1.07)                                         | 0.020               |
| Female                                | 95 (71)                                            | 75 (64)                                          | 0.252                 |                                   |                     |                                                 |                     |                                                          |                     |
| Infection                             | 90 (67)                                            | 38 (33)                                          | <.001                 |                                   |                     |                                                 |                     |                                                          |                     |
| Pneumonia                             | 40 (30)                                            | 5 (4)                                            | <.001                 | 7.63 (2.44-23.81)                 | 0.001               | 5.71 (1.86-17.58)                               | 0.002               | 4.96 (1.59-15.47)                                        | 0.006               |
| WFNS 4-5                              | 68 (51)                                            | 25 (21)                                          | <.001                 | 1.81 (0.92-3.57)                  | 0.085               | 1.93 (0.98-3.81)                                | 0.057               | 1.97 (1-3.89)                                            | 0.049               |
| Modified Fisher 3-4                   | 128 (96)                                           | 89 (76)                                          | <.001                 | 2.95 (0.99-8.79)                  | 0.052               | 2.91 (0.96-8.8)                                 | 0.058               | 2.97 (0.97-9.04)                                         | 0.056               |
| Hydrocephalus                         | 127 (95)                                           | 60 (51)                                          | <.001                 | 13.46 (5.03-35.99)                | <.001               | 13.3 (4.9-36.13)                                | <.001               | 13.47 (4.93-36.78)                                       | <.001               |
| Rebleeding                            | 5 (4)                                              | 1 (1)                                            | 0.173                 |                                   |                     |                                                 |                     |                                                          |                     |
| Angiographic vasospasm                | 62 (46)                                            | 45 (39)                                          | 0.213                 |                                   |                     |                                                 |                     |                                                          |                     |
| DCI                                   | 64 (48)                                            | 35 (30)                                          | 0.004                 | 2.18 (1.13-4.22)                  | 0.021               | 2.03 (1.04-3.96)                                | 0.038               | 1.98 (1.01-3.88)                                         | 0.046               |
| Updated DCI protocol                  | 97 (72)                                            | 90 (77)                                          | 0.411                 |                                   |                     |                                                 |                     |                                                          |                     |
| Sepsis-1                              | 88 (66)                                            | 36 (31)                                          | <.001                 |                                   |                     |                                                 |                     |                                                          |                     |
| Sepsis-3_orig                         | 46 (34)                                            | 13 (11)                                          | <.001                 |                                   |                     |                                                 |                     |                                                          |                     |
| Sepsis-3_rational                     | 46 (34)                                            | 13 (11)                                          | <.001                 |                                   |                     |                                                 |                     |                                                          |                     |
| Alternative sepsis criteria           | 44 (33)                                            | 11 (9)                                           | <.001                 |                                   |                     |                                                 |                     |                                                          |                     |
| Septic shock Sepsis-1                 | 79 (59)                                            | 25 (21)                                          | <.001                 |                                   |                     |                                                 |                     |                                                          |                     |
| Septic shock Sepsis-3_orig            | 17 (13)                                            | 5 (4)                                            | 0.025                 |                                   |                     |                                                 |                     |                                                          |                     |
| Septic shock Sepsis-3_mod             | 21 (16)                                            | 4 (3)                                            | 0.003                 |                                   |                     | 3.01 (0.84-10.8)                                | 0.090               |                                                          |                     |
| Alternative criteria for septic shock | 24 (18)                                            | 3 (3)                                            | 0.001                 |                                   |                     |                                                 |                     | 4.37 (1-19.05)                                           | 0.049               |

Statistical significance highlighted in bold; \*thereby comparable to Gonçalves B, Kurtz P, Turon R, Santos T, Prazeres M, Righy C, et al. Incidence and impact of sepsis on long-term outcomes after subarachnoid hemorrhage: a prospective observational study. Annals of Intensive Care. 2019;9(1):94.

CLM 95% Confidence Limit for the Mean, DCI delayed cerebral ischemia, OR Odds Ratio, WFNS World Federation of Neurological Surgeons SAH grading scale; <sup>a</sup> Model 2 shows all multivariable models where sepsis criteria did not reach significance (Sepsis-1, Sepsis-3\_orig, Sepsis-3\_mod, alternative sepsis criteria, septic shock Sepsis-1 and septic shock Sepsis-3\_orig).

**Table S6.** Univariate and multivariate logistic regression models including different criteria for sepsis added separately to a model of SAH variables to investigate association with in-hospital mortality.

| Variable                    | Deceased<br>N=55, N (%) | Survived<br>N=215, N (%) | Univariate<br>p value | Multivariate model 3 <sup>a</sup> |                     | Multivariate model alternative sepsis criteria |                     |
|-----------------------------|-------------------------|--------------------------|-----------------------|-----------------------------------|---------------------|------------------------------------------------|---------------------|
|                             |                         |                          |                       | adjusted<br>OR (95% CI)           | adjusted<br>p value | adjusted<br>OR (95% CI)                        | adjusted<br>p value |
| Age, mean (CLM)             | 63 (59-66)              | 57 (55-58)               | 0.002                 |                                   |                     | 1.02 (1-1.05)                                  | 0.100               |
| Female                      | 36 (66)                 | 146 (67.9%)              | 0.729                 |                                   |                     |                                                |                     |
| Infection                   | 20 (36)                 | 109 (50.7%)              | 0.060                 | 0.26 (0.11-0.65)                  | 0.004               | 0.19 (0.07-0.52)                               | 0.001               |
| Pneumonia                   | 12 (22)                 | 34 (15.8%)               | 0.292                 | 2.95 (0.99-8.82)                  | 0.052               |                                                |                     |
| WFNS 4-5                    | 38 (69)                 | 70 (32.6%)               | <.001                 | 4.49 (2.2-9.18)                   | <.001               | 4.53 (2.19-9.37)                               | <.001               |
| Modified Fisher 3-4         | 53 (96)                 | 182 (84.7%)              | 0.035                 | 5.82 (1.15-29.56)                 | 0.034               | 4.74 (0.9-24.86)                               | 0.066               |
| Hydrocephalus               | 50 (91)                 | 154 (71.6%)              | 0.005                 |                                   |                     |                                                |                     |
| Rebleeding                  | 6 (11)                  | 4 (1.9%)                 | 0.005                 | 9.69 (2.07-45.25)                 | 0.004               | 8.83 (1.81-43.05)                              | 0.007               |
| Angiographic vasospasm      | 15 (27)                 | 92 (42.8%)               | 0.038                 |                                   |                     |                                                |                     |
| DCI                         | 16 (29)                 | 83 (38.6%)               | 0.194                 |                                   |                     |                                                |                     |
| Updated DCI protocol        | 33 (60)                 | 168 (78.1%)              | 0.007                 | 0.26 (0.13-0.55)                  | <.001               | 0.28 (0.14-0.59)                               | 0.001               |
| Sepsis-1                    | 20 (36)                 | 105 (48.8%)              | 0.100                 |                                   |                     |                                                |                     |
| Sepsis-3_orig               | 11 (20)                 | 49 (22.8%)               | 0.657                 |                                   |                     |                                                |                     |
| Sepsis-3_mod                | 13 (24)                 | 47 (21.9%)               | 0.778                 |                                   |                     |                                                |                     |
| Alternative sepsis criteria | 14 (26)                 | 42 (19.5%)               | 0.335                 |                                   |                     | 4.24 (1.35-13.31)                              | 0.013               |

Statistical significance highlighted in bold

CLM 95% Confidence Limit for the Mean, DCI delayed cerebral ischemia, OR Odds Ratio, WFNS World Federation of Neurological Surgeons SAH grading scale

<sup>a</sup>Model 3 shows all multivariable models where sepsis criteria did not reach significance (Sepsis-1, Sepsis-3\_orig, Sepsis-3\_mod).

**Table S7.** Univariate and multivariate logistic regression models including different criteria for septic shock added separately to a model of SAH variables to investigate association with in-hospital mortality.

| Variable                                    | Deceased<br>N=55<br>N (%) | Survived<br>N=215<br>N (%) | Uni-<br>variate<br>p value | Multivariate model<br>septic shock<br>Sepsis-1 |                     | Multivariate model<br>septic shock<br>Sepsis-3_orig |                     | Multivariate model<br>septic shock<br>Sepsis-3_mod |                     | Multivariate<br>model<br>alternative criteria<br>for septic shock |                     |
|---------------------------------------------|---------------------------|----------------------------|----------------------------|------------------------------------------------|---------------------|-----------------------------------------------------|---------------------|----------------------------------------------------|---------------------|-------------------------------------------------------------------|---------------------|
|                                             |                           |                            |                            | adjusted<br>OR<br>(95%CI)                      | adjusted<br>p value | adjusted<br>OR<br>(95%CI)                           | adjusted<br>p value | adjusted<br>OR<br>(95%CI)                          | adjusted<br>p value | adjusted<br>OR<br>(95%CI)                                         | adjusted<br>p value |
| Age, mean<br>(CLM)                          | 63 (59-66)                | 57 (55-58)                 | <b>0.002</b>               |                                                |                     | 1.03 (1-<br>1.06)                                   | 0.079               | 1.03 (1-<br>1.06)                                  | 0.070               |                                                                   |                     |
| Female                                      | 36 (66)                   | 146 (68)                   | 0.729                      |                                                |                     |                                                     |                     |                                                    |                     |                                                                   |                     |
| Infection                                   | 20 (36)                   | 109 (51)                   | 0.060                      | 0.26 (0.11-<br>0.65)                           | <b>0.004</b>        | 0.29 (0.13-<br>0.64)                                | <b>0.002</b>        | 0.23 (0.1-<br>0.53)                                | <b>0.001</b>        | 0.23 (0.1-<br>0.53)                                               | <b>0.001</b>        |
| Pneumonia                                   | 12 (22)                   | 34 (16)                    | 0.292                      | 2.95 (0.99-<br>8.82)                           | 0.052               |                                                     |                     |                                                    |                     |                                                                   |                     |
| WFNS 4-5                                    | 38 (69)                   | 70 (33)                    | <b>&lt;.001</b>            | 4.49 (2.2-<br>9.18)                            | <b>&lt;.001</b>     | 4.53 (2.19-<br>9.38)                                | <b>&lt;.001</b>     | 5.09 (2.41-<br>10.73)                              | <b>&lt;.001</b>     | 5.54 (2.66-<br>11.54)                                             | <b>&lt;.001</b>     |
| Modified Fisher<br>3-4                      | 53 (96)                   | 182 (85)                   | <b>0.035</b>               | 5.82 (1.15-<br>29.56)                          | <b>0.034</b>        | 5.19 (0.99-<br>27.2)                                | 0.051               | 5.23 (0.97-<br>28.11)                              | 0.054               | 6.11 (1.16-<br>32.08)                                             | <b>0.033</b>        |
| Hydro-cephalus                              | 50 (91)                   | 154 (72)                   | <b>0.005</b>               |                                                |                     |                                                     |                     |                                                    |                     |                                                                   |                     |
| Rebleeding                                  | 6 (11)                    | 4 (2)                      | <b>0.005</b>               | 9.69 (2.07-<br>45.25)                          | <b>0.004</b>        | 8.95 (1.85-<br>43.3)                                | <b>0.006</b>        | 9.86 (1.96-<br>49.52)                              | <b>0.005</b>        | 11.45<br>(2.34-56)                                                | <b>0.003</b>        |
| Angiographic<br>vasospasm                   | 15 (27)                   | 92 (43)                    | <b>0.038</b>               |                                                |                     |                                                     |                     |                                                    |                     |                                                                   |                     |
| DCI                                         | 16 (29)                   | 83 (39)                    | 0.194                      |                                                |                     |                                                     |                     |                                                    |                     |                                                                   |                     |
| Updated DCI<br>protocol                     | 33 (60)                   | 168 (78)                   | <b>0.007</b>               | 0.26 (0.13-<br>0.55)                           | <b>&lt;.001</b>     | 0.28 (0.13-<br>0.58)                                | <b>0.001</b>        | 0.26 (0.12-<br>0.56)                               | <b>0.001</b>        | 0.27 (0.13-<br>0.57)                                              | <b>&lt;.001</b>     |
| Septic shock<br>Sepsis-1                    | 20 (36)                   | 85 (40)                    | 0.667                      |                                                |                     |                                                     |                     |                                                    |                     |                                                                   |                     |
| Septic shock<br>Sepsis-3_orig               | 7 (13)                    | 16 (7)                     | 0.216                      |                                                |                     | 4.22 (1.25-<br>14.25)                               | <b>0.020</b>        |                                                    |                     |                                                                   |                     |
| Septic shock<br>Sepsis-3_mod                | 9 (16)                    | 17 (8)                     | 0.063                      |                                                |                     |                                                     |                     | 7.58 (2.33-<br>24.67)                              | <b>0.001</b>        |                                                                   |                     |
| Alternative<br>criteria for<br>septic shock | 10 (18)                   | 18 (8)                     | <b>0.038</b>               |                                                |                     |                                                     |                     |                                                    |                     | 7.48 (2.35-<br>23.74)                                             | <b>&lt;.001</b>     |

Statistical significance highlighted in bold

CLM 95% Confidence Limit for the Mean, DCI delayed cerebral ischemia, OR Odds Ratio, WFNS World Federation of Neurological Surgeons SAH grading scale.



**Table S8.** Sensitivity analysis excluding patients who deceased within 48 hours after ICU admission: Univariate and multivariate logistic regression models including different criteria for sepsis added separately to a model of SAH variables to investigate association with in-hospital mortality.

| Variable                       | Deceased<br>N=55, N (%) | Survived<br>N=215, N (%) | Univariate<br>p value | Multivariate model 4 <sup>a</sup> |                     | Multivariate model<br>alternative sepsis<br>criteria |                     |
|--------------------------------|-------------------------|--------------------------|-----------------------|-----------------------------------|---------------------|------------------------------------------------------|---------------------|
|                                |                         |                          |                       | adjusted<br>OR (95% CI)           | adjusted<br>p value | adjusted<br>OR (95% CI)                              | adjusted<br>p value |
| Age, mean (CLM)                | 60 (55-65)              | 57 (55-58)               | 0.142                 |                                   |                     |                                                      |                     |
| Female                         | 24 (67)                 | 146 (68)                 | 0.883                 |                                   |                     |                                                      |                     |
| Infection                      | 19 (53)                 | 109 (51)                 | 0.817                 |                                   |                     |                                                      |                     |
| Pneumonia                      | 11 (31)                 | 34 (16)                  | <b>0.037</b>          | 2.11 (0.87-<br>5.11)              | 0.097               |                                                      |                     |
| WFNS 4-5                       | 23 (64)                 | 70 (33)                  | <b>0.001</b>          | 3.09 (1.41-<br>6.77)              | <b>0.005</b>        | 3.41 (1.57-7.43)                                     | <b>0.002</b>        |
| Modified Fisher 3-4            | 35 (97)                 | 182 (85)                 | 0.073                 | 6.32 (0.77-<br>51.65)             | 0.086               | 5.86 (0.72-<br>47.99)                                | 0.099               |
| Hydrocephalus                  | 33 (92)                 | 154 (72)                 | <b>0.018</b>          |                                   |                     |                                                      |                     |
| Rebleeding                     | 2 (6)                   | 4 (2)                    | 0.201                 |                                   |                     |                                                      |                     |
| Angiographic<br>vasospasm      | 15 (42)                 | 92 (43)                  | 0.900                 |                                   |                     |                                                      |                     |
| DCI                            | 16 (44)                 | 83 (39)                  | 0.508                 |                                   |                     |                                                      |                     |
| Updated DCI<br>protocol        | 19 (53)                 | 168 (78)                 | <b>0.002</b>          | 0.23 (0.1-0.51)                   | <b>&lt;.001</b>     | 0.25 (0.11-0.54)                                     | <b>0.001</b>        |
| Sepsis-1                       | 19 (53)                 | 105 (49)                 | 0.662                 |                                   |                     |                                                      |                     |
| Sepsis-3_orig                  | 10 (28)                 | 49 (23)                  | 0.515                 |                                   |                     |                                                      |                     |
| Sepsis-3_mod                   | 12 (33)                 | 47 (22)                  | 0.137                 |                                   |                     |                                                      |                     |
| Alternative sepsis<br>criteria | 13 (36)                 | 42 (20)                  | <b>0.029</b>          |                                   |                     | 2.13 (0.94-4.82)                                     | 0.069               |

Statistical significance highlighted in bold

CLM 95% Confidence Limit for the Mean, DCI delayed cerebral ischemia, OR Odds Ratio, WFNS World Federation of Neurological Surgeons SAH grading scale

<sup>a</sup> Model 4 shows all multivariable models where sepsis criteria did not reach significance (Sepsis-1, Sepsis-3\_orig, Sepsis-3\_mod).

**Table S9.** Sensitivity analysis excluding patients who deceased within 48 hours after ICU admission: Univariate and multivariate logistic regression models including different criteria for septic shock added separately to a model of SAH variables to investigate association with in-hospital mortality.

| Variable                                    | Deceased<br>N=55<br>N (%) | Survived<br>N=215<br>N (%) | Uni-<br>variate<br>p value | Multivariate model<br>septic shock<br>Sepsis-1 |                     | Multivariate model<br>septic shock<br>Sepsis-3_orig |                     | Multivariate model<br>septic shock<br>Sepsis-3_mod |                     | Multivariate<br>model<br>alternative criteria<br>for septic shock |                     |
|---------------------------------------------|---------------------------|----------------------------|----------------------------|------------------------------------------------|---------------------|-----------------------------------------------------|---------------------|----------------------------------------------------|---------------------|-------------------------------------------------------------------|---------------------|
|                                             |                           |                            |                            | adjusted<br>OR<br>(95%CI)                      | adjusted<br>p value | adjusted<br>OR<br>(95%CI)                           | adjusted<br>p value | adjusted<br>OR<br>(95%CI)                          | adjusted<br>p value | adjusted<br>OR<br>(95%CI)                                         | adjusted<br>p value |
| Age, mean<br>(CLM)                          | 60 (55-65)                | 57 (55-58)                 | 0.142                      |                                                |                     |                                                     |                     |                                                    |                     |                                                                   |                     |
| Female                                      | 24 (67)                   | 146 (68)                   | 0.883                      |                                                |                     |                                                     |                     |                                                    |                     |                                                                   |                     |
| Infection                                   | 19 (53)                   | 109 (51)                   | 0.817                      |                                                |                     |                                                     |                     |                                                    |                     |                                                                   |                     |
| Pneumonia                                   | 11 (31)                   | 34 (16)                    | <b>0.037</b>               | 2.11 (0.87-<br>5.11)                           | 0.097               |                                                     |                     |                                                    |                     |                                                                   |                     |
| WFNS 4-5                                    | 23 (64)                   | 70 (33)                    | <b>0.001</b>               | 3.09 (1.41-<br>6.77)                           | <b>0.005</b>        | 3.46 (1.59-<br>7.52)                                | <b>0.002</b>        | 3.82 (1.71-<br>8.5)                                | <b>0.001</b>        | 3.79 (1.7-<br>8.44)                                               | <b>0.001</b>        |
| Modified Fisher<br>3-4                      | 35 (97)                   | 182 (85)                   | 0.073                      | 6.32 (0.77-<br>51.65)                          | 0.086               | 6.7 (0.81-<br>55.61)                                | 0.078               | 6.79 (0.78-<br>58.89)                              | 0.082               | 6.65 (0.77-<br>57.7)                                              | 0.086               |
| Hydro-cephalus                              | 33 (92)                   | 154 (72)                   | <b>0.018</b>               |                                                |                     |                                                     |                     |                                                    |                     |                                                                   |                     |
| Rebleeding                                  | 2 (6)                     | 4 (2)                      | 0.201                      |                                                |                     |                                                     |                     | 5.73 (0.71-<br>46.27)                              | 0.102               | 5.83 (0.73-<br>46.87)                                             | 0.097               |
| Angiographic<br>vasospasm                   | 15 (42)                   | 92 (43)                    | 0.900                      |                                                |                     |                                                     |                     |                                                    |                     |                                                                   |                     |
| DCI                                         | 16 (44)                   | 83 (39)                    | 0.508                      |                                                |                     |                                                     |                     |                                                    |                     |                                                                   |                     |
| Updated DCI<br>protocol                     | 19 (53)                   | 168 (78)                   | <b>0.0018</b>              | 0.23 (0.1-<br>0.51)                            | <b>&lt;.001</b>     | 0.24 (0.11-<br>0.54)                                | <b>0.001</b>        | 0.23 (0.1-<br>0.52)                                | <b>&lt;.001</b>     | 0.24 (0.11-<br>0.53)                                              | <b>0.001</b>        |
| Septic shock<br>Sepsis-1                    | 19 (53)                   | 85 (40)                    | 0.138                      |                                                |                     |                                                     |                     |                                                    |                     |                                                                   |                     |
| Septic shock<br>Sepsis-3_orig               | 6 (17)                    | 16 (7)                     | 0.078                      |                                                |                     | 2.55 (0.85-<br>7.64)                                | 0.095               |                                                    |                     |                                                                   |                     |
| Septic shock<br>Sepsis-3_mod                | 8 (22)                    | 17 (8)                     | <b>0.011</b>               |                                                |                     |                                                     |                     | 4.12 (1.49-<br>11.38)                              | <b>0.006</b>        |                                                                   |                     |
| Alternative<br>criteria for<br>septic shock | 9 (25)                    | 18 (8)                     | <b>0.005</b>               |                                                |                     |                                                     |                     |                                                    |                     | 4.28 (1.6-<br>11.5)                                               | <b>0.004</b>        |

Statistical significance highlighted in bold

CLM 95% Confidence Limit for the Mean, DCI delayed cerebral ischemia, OR Odds Ratio, WFNS World Federation of Neurological Surgeons SAH grading scale.
